# Supplementary material
Source: publisher figshare collection journal article supplement (https://karger.figshare.com/ndownloader/files/8718385)
Supplement: Supplementary file 1 [file 8718385]

### *Appendix 1: Medline Search Strategy*

1. exp Parkinson Disease/
2. exp Incidence/
3. exp Prevalence/
4. exp Epidemiology/
5. 2 or 3 or 4
6. 1 and 5
7. \*Parkinson Disease/ep [Epidemiology]
8. 6 or 7
9. 8
10. limit 9 to yr="2001 -Current"
11. limit 10 to animals
12. 10 not 11

## *Appendix 2: Quality Criteria<sup>3,4</sup>*

### Representativeness of sample

1. Is the target population clearly defined?

e.g. The target population must be defined by shared characteristics assessed and measured accurately. Some of these characteristics include age, sex, ethnicity, income, etc. Clear inclusion and exclusion criteria.

2. Was either of the following ascertainment method used (must be one or the other):

- a. Probability sampling OR
- b. Entire population surveyed

e.g. Members of the target population were identified through a sampling frame or listing of potential respondents. This listing must provide access to all members of the defined target population except for exclusions acknowledged by the study authors.

3. Is the response rate >70%
4. Are non-responders clearly described?
5. Is the sample representative of the target population

e.g. need to ensure that non-responders have similar characteristics as responders (otherwise may have selection bias)

### Assessment of neurological condition

6. Were data collection methods standardized?

e.g. Identical methods of assessment and data collection were used with all respondents so that the information for analysis is completely comparable. Standardization of methods not only refers to eliciting information from respondents but also to interviewing training, supervision, enlistment of respondents and processing of data.

7. Were validated criteria used to assess for the presence/absence of disease?

e.g. or a validated scale, diagnostic tool, survey, etc.

### Statistical Analysis

8. Are the estimates of prevalence and incidence given with confidence interval and in detail by subgroup (if applicable)?

### Appendix 3: Flow Diagrams

#### Flow Chart for 2011 Search

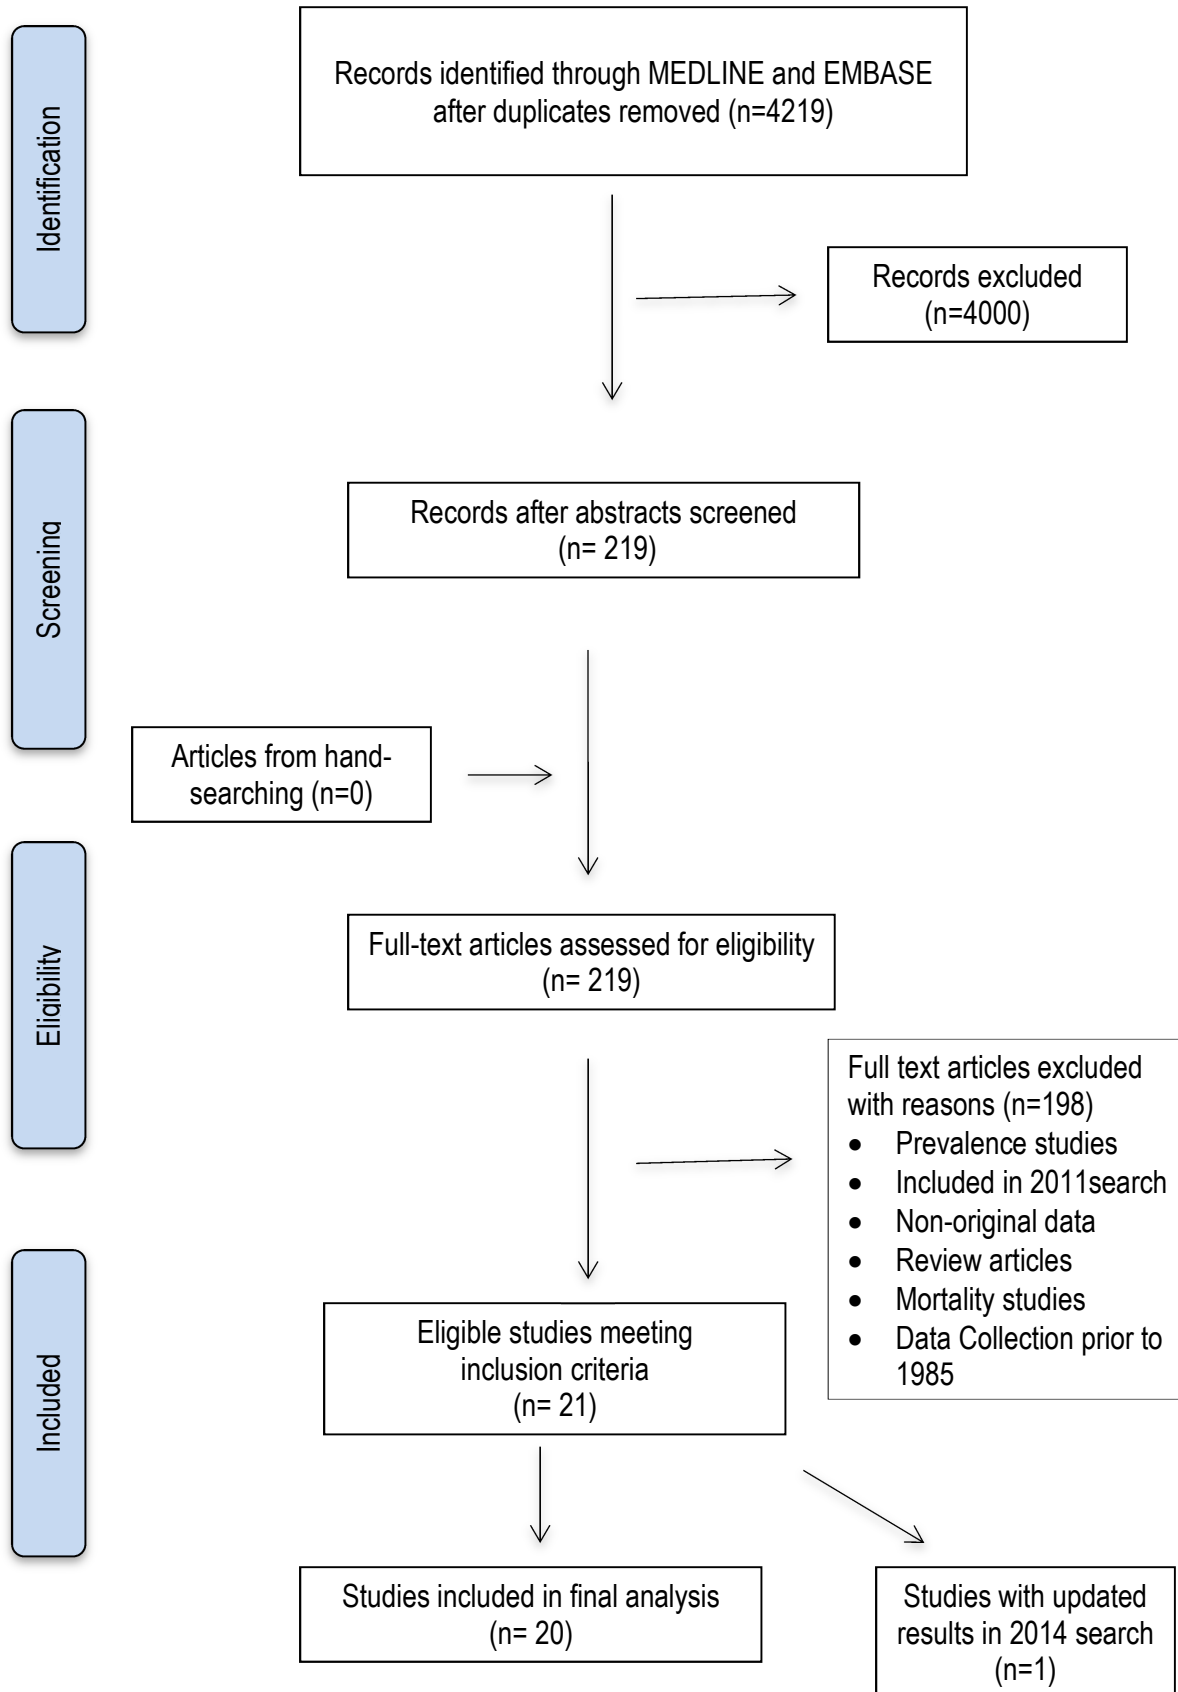

*Flow Chart for June 2014 Search*

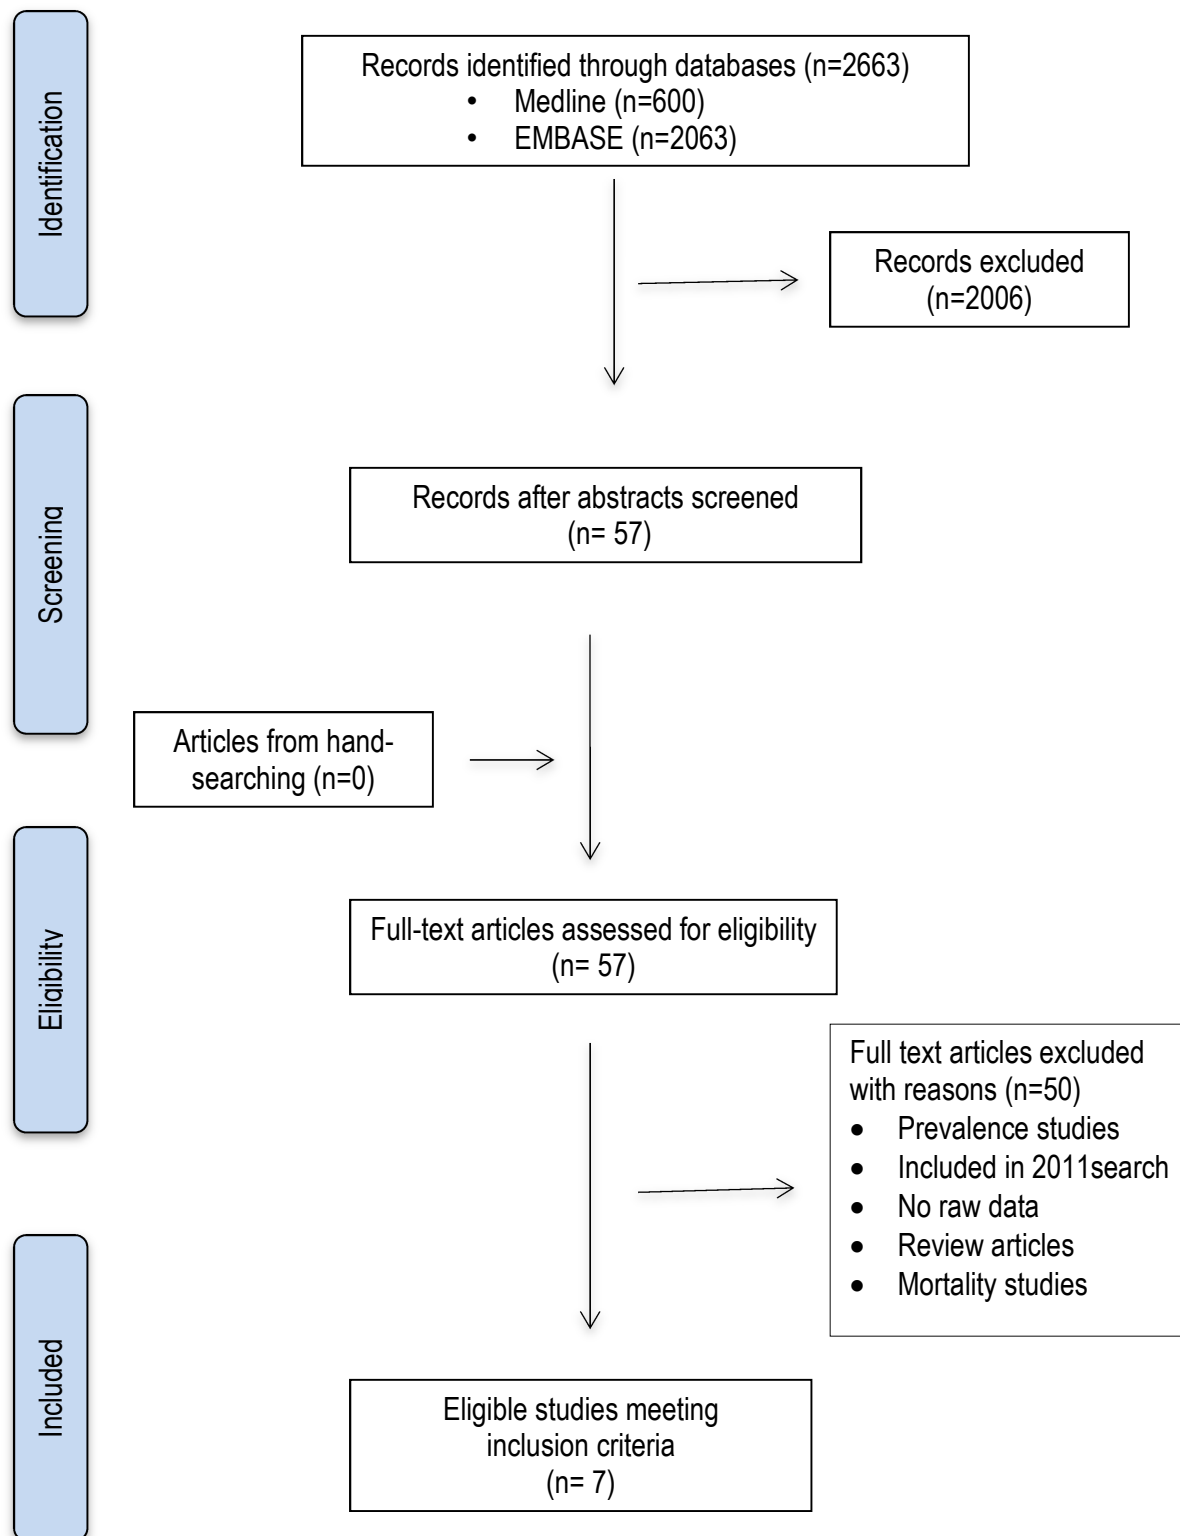

#### Appendix 4: Table of Included Studies

| Study, Year                            | Country, Continent       | Population                         | Age      | Cases; Total Sample: Total Person-Years                  | Validated Diagnostic Criteria     | Data Source                                                         | Diagnosis Established by                                         | Overall Incidence (per 100,000) (IR or IP) | Quality Rating | Included In Meta-Analysis?      |
|----------------------------------------|--------------------------|------------------------------------|----------|----------------------------------------------------------|-----------------------------------|---------------------------------------------------------------------|------------------------------------------------------------------|--------------------------------------------|----------------|---------------------------------|
| Alves, 2009 <sup>5</sup>               | Norway, Europe           | Children; Adults; Elderly          | All ages | 265 cases; 1,052,075 persons                             | 2 of 4 cardinal features          | Multiple: Hospital/clinic chart review; Search for referral letters | Clinical Assessment by Health professional                       | 13.7 (IP)                                  | 5              | Yes; Incidence Proportion       |
| Bauso, 2014 <sup>6</sup>               | Argentina, South America | Infants; Children; Adults; Elderly | All ages | 239 cases; 140,000 persons; 754082 person years          | UK PD Society Brain Bank Criteria | Administrative databases; Prescription drug databases               | Medical Chart Review by specialist                               | 31.2 (IR)                                  | 6              | Yes; Incidence Rate             |
| Benito-Leon, 2004 <sup>7</sup>         | Spain, Europe            | Elderly                            | 65+      | 30 cases; 3813 persons; 12,710 person years              | Cardinal features of PD           | Door to door study                                                  | Clinical Assessment by Health professional; Medical chart review | 235.9 (IR)                                 | 7              | Yes; Incidence Rate             |
| Brandt-Christensen, 2006 <sup>19</sup> | Denmark, Europe          | Adults; Elderly                    | 30+      | Cases not given; Total population of Denmark (not given) | Not specified                     | Prescription drug database                                          | Use of specific prescription drug                                | 55.9 (IR)                                  | 4              | No; Not Stratified by age group |
| Caslake, 2013 <sup>8</sup>             | United Kingdom, Europe   | Infants; Children; Adults; Elderly | All ages | 363 cases; 1,176,552 person years                        | UK PD Society Brain Bank Criteria | Mailed survey; Prescription drug databases; Physician referral      | Clinical Assessment by Health professional; Medical chart review | 17.9 (IR)                                  | 6              | Yes; Incidence Rate             |
| Chen, 2001 <sup>9</sup>                | Taiwan, Asia             | Adults; Elderly                    | 40+      | 15 cases; 9972 persons; 49,830 person years              | 2 of 4 cardinal features          | Administrative data                                                 | ICD code 332                                                     | 30.1 (IP)                                  | 6              | Yes; Incidence Proportion       |
| Chillag-Talmor, 2011 <sup>28</sup>     | Israel, Asia             | Adults; Elderly                    | 20-84    | 5288 cases                                               | Not specified                     | Prescription drug databases                                         | Use of specific prescription drug                                | 33 (IP)                                    | 4              | No; Not stratified by age group |

| Study, Year                  | Country, Continent      | Population                         | Age      | Cases; Total Sample:<br>Total Person-Years            | Validated Diagnostic Criteria     | Data Source                                                                         | Diagnosis Established by                                                       | Overall Incidence (per 100,000) (IR or IP) | Quality Rating | Included In Meta-Analysis?                   |
|------------------------------|-------------------------|------------------------------------|----------|-------------------------------------------------------|-----------------------------------|-------------------------------------------------------------------------------------|--------------------------------------------------------------------------------|--------------------------------------------|----------------|----------------------------------------------|
| Das, 2010 <sup>29</sup>      | India, Asia             | Children; Adults; Elderly          | All ages | 23 cases over 5 years; 100,802 persons                | 2 of 4 cardinal features          | Door-to-door survey                                                                 | Clinical Assessment by Health professional                                     | 4.56 (IR)                                  | 6              | No; presented average annual incidence rates |
| De Lau, 2004 <sup>10</sup>   | The Netherlands, Europe | Adults; Elderly                    | 55+      | 67 cases; 38,422 person years                         | 2 or more cardinal features       | Prospective cohort study                                                            | Clinical Assessment by Health professional                                     | 174.4 (IR)                                 | 6              | Yes; Incidence Rate                          |
| Driver, 2009 <sup>11</sup>   | USA, North America      | Adults; Elderly                    | 40+      | 563 cases; 21,970 persons; 467,316.5 person years     | Self report of PD diagnosis       | Mailed survey                                                                       | Self-report of a condition (diagnosed or undiagnosed by a health professional) | 120.48 (IR)                                | 4              | Yes: Incidence Rate                          |
| Duncan, 2014 <sup>12</sup>   | United Kingdom, Europe  | Infants; Children; Adults; Elderly | All ages | 155 cases; 488576 persons; 977152 person years        | Queen Square Brain Bank Criteria  | Hospital/clinic chart review; Physician referral                                    | Clinical Assessment by a Health Professional                                   | 15.9 (IR)                                  | 6              | Yes: Incidence Rate                          |
| Horsfall, 2013 <sup>20</sup> | United Kingdom, Europe  | Adults; Elderly                    | 50+      | Not stated                                            | Not specified                     | Administrative databases                                                            | Medical Chart Review, Use of specific prescription drug                        | 84 (IP)                                    | 5              | No; Not stratified by sex                    |
| Hristova, 2010 <sup>21</sup> | Bulgaria, Europe        | Children; Adults; Elderly          | All ages | 2,133,521 person years                                | UK PD Society Brain Bank Criteria | Registry                                                                            | Clinical Assessment by Health professional; Imaging Test                       | 11.44 (IR)                                 | 5              | No; raw data not reported                    |
| Jones, 2012 <sup>13</sup>    | Canada, North America   | Elderly                            | 65+      | 10,910 cases; 768,827 persons; 6,051,682 person-years | Not specified                     | Hospital/clinic chart review; Administrative databases; Prescription drug databases | ICD code 332, use of a prescription drug                                       | 252 (IR)                                   | 5              | Yes; Incidence Rate                          |

| Study, Year                   | Country, Continent   | Population                | Age       | Cases; Total Sample: Total Person-Years          | Validated Diagnostic Criteria                            | Data Source                                            | Diagnosis Established by                                                     | Overall Incidence (per 100,000) (IR or IP) | Quality Rating | Included In Meta-Analysis?           |
|-------------------------------|----------------------|---------------------------|-----------|--------------------------------------------------|----------------------------------------------------------|--------------------------------------------------------|------------------------------------------------------------------------------|--------------------------------------------|----------------|--------------------------------------|
| Kyrozis, 2013 <sup>22</sup>   | Greece, Europe       | Adults; Elderly           | 20-86     | Not stated                                       | UK PD Society Brain Bank Criteria                        | Cohort                                                 | Self-report of a condition (confirmed with follow-up by Health Professional) | 41 (IR)                                    | 6              | No; Not stratified by sex            |
| Leentjens, 2003 <sup>23</sup> | Netherlands, Europe  | Children; Adults; Elderly | All ages  | 139 cases; 82,430 persons                        | Cardinal features of PD                                  | Administrative database                                | Administrative data codes                                                    | 22.4 (IR)                                  | 5              | No; raw data not reported            |
| Linder, 2010 <sup>14</sup>    | Sweden, Europe       | Children; Adults; Elderly | All ages  | 112 cases; 141,950 persons; 567,800 person years | UK PD Society Brain Bank Criteria                        | Request for referrals of individuals with parkinsonism | Clinical Assessment by Health professional                                   | 19.7 (IP)                                  | 5              | No; raw data not reported            |
| Mehta, 2007 <sup>31</sup>     | Australia, Australia | Adults; Elderly           | 49+       | 19 cases over 10 years in 2545 persons           | Not specified                                            | Cohort study                                           | Self report or use of drug; diagnosis confirmed by doctor                    | 81 (IP)                                    | 2              | No; not stratified by age or gender  |
| Morioka, 2002 <sup>15</sup>   | Japan, Asia          | Children; Adults; Elderly | All ages  | Not stated                                       | Japanese Research Committee on Neurodegenerative Disease | Mailed survey                                          | Clinical Assessment by Health professional                                   | 16.9 (IP)                                  | 5              | Yes; Incidence Proportion            |
| Perez, 2010 <sup>24</sup>     | France, Europe       | Elderly                   | 65+       | 68 cases; 25,820 person years                    | UK PD Society Brain Bank Criteria                        | Random sampling procedure                              | Clinical Assessment by Health Professional                                   | 263.4 (IR)                                 | 5              | No; not stratified by age and gender |
| Taba, 2003 <sup>25</sup>      | Estonia, Europe      | Children; Adults; Elderly | All ages, | 264 cases over 8 years; 156,417 persons          | UK PD Society Brain Bank Criteria                        | Hospital/clinic chart review; GPs; nursing homes       | Clinical Assessment by Health Professional                                   | 18.8 (IR)                                  | 4              | No; not stratified by age and gender |



| Study, Year                       | Country, Continent    | Population                | Age      | Cases; Total Sample:<br>Total Person-Years | Validated Diagnostic Criteria     | Data Source                                                                                   | Diagnosis Established by                     | Overall Incidence (per 100,000) (IR or IP) | Quality Rating | Included In Meta-Analysis?          |
|-----------------------------------|-----------------------|---------------------------|----------|--------------------------------------------|-----------------------------------|-----------------------------------------------------------------------------------------------|----------------------------------------------|--------------------------------------------|----------------|-------------------------------------|
| Tan, 2007 <sup>16</sup>           | Singapore, Asia       | Adults; Elderly           | 50+      | 12 cases; 31,426 person years              | Gelb Criteria                     | Hospital/clinic chart review; Telephone survey; Administrative databases                      | Clinical Assessment by a Health Professional | 33 (IR)                                    | 5              | Yes; Incidence Rate                 |
| Van Den Eeden, 2003 <sup>17</sup> | USA, North America    | Adults; Elderly           | 20+      | 588 cases; 4,776,038 person years          | Hughes Diagnostic Criteria        | Hospital/clinic chart review; Registry; Administrative databases; Prescription drug databases | Clinical assessment by a Health Professional | 12.3 (IR)                                  | 5              | Yes; Incidence Rate                 |
| Van de Vijver, 2001 <sup>26</sup> | Netherlands, Europe   | Adults; Elderly           | 55+      | 300,000 persons in database                | Not specified                     | Prescription drug database                                                                    | Use of specific prescription drug            | 102 (IP)                                   | 3              | No; raw data not reported           |
| Wermuth, 2008 <sup>27</sup>       | Faroe Islands, Europe | Children; Adults; Elderly | All ages | 97 cases over 10 years; 45878 persons      | 2 of 3 cardinal features          | Hospital/clinic chart review; Prescription drug database; GPs                                 | Clinical Assessment by a Health Professional | 21.1 (IP)                                  | 4              | No; not stratified by age or gender |
| Willis, 2010 <sup>30</sup>        | USA, North America    | Elderly                   | 65+      | 29,530,834 persons                         | Not specified                     | Administrative databases                                                                      | ICD code                                     | 445.79 (IR)                                | 4              | No; raw data not reported           |
| Winter, 2010 <sup>18</sup>        | Russia, Europe        | Children; Adults; Elderly | All ages | 308 cases, 3,094,750 person years          | UK PD Society Brain Bank Criteria | Population screening; search of records of primary care and hospitals                         | Clinical Assessment by a Health Professional | 9.95 (IR)                                  | 5              | Yes; Incidence Rate                 |
